# Supplementary material for: Transition metal induced switch of fluorescence and absorption response of a Zn(ii)porphyrin–DNA conjugate to cysteine derivatives
Source: Royal Society of Chemistry journal article supplement (doi:10.1039/c4ra16453a), 2015-01-01
Supplement: c4ra16453a1.pdf [file c4ra16453a1.pdf]

Supporting Information

for the manuscript entitled

**Transition metal induced switch of fluorescence and  
absorption responses of Zn(II)porphyrin-DNA conjugate  
to cysteine derivatives**

Jung Kyu Choi, Gevorg Sargsyan, Breiana D. Johnson, Milan Balaz\*

*University of Wyoming, Department of Chemistry, Laramie, WY 82071, USA*

E-mail: [mbalaz@uwyo.edu](mailto:mbalaz@uwyo.edu)

## ESI: Table of Contents

|                                                                                                                                                                                                              | <b>page</b> |
|--------------------------------------------------------------------------------------------------------------------------------------------------------------------------------------------------------------|-------------|
| <b>Figure S1:</b> UV-vis absorption and emission spectra of <b>ZnPorT8</b> titrated with <i>Cys</i>                                                                                                          | ..... S3    |
| <b>Figure S2:</b> UV-vis absorption and emission spectra of <b>ZnPorT8</b> titrated with <i>GSH</i>                                                                                                          | ..... S3    |
| <b>Figure S3:</b> UV-vis absorption and emission spectra of <b>ZnPorT8/Hg<sup>2+</sup></b> complex (3.0 $\mu\text{M}$ $\text{Hg}^{2+}$ ) titrated with <i>Cys</i>                                            | .....S4     |
| <b>Figure S4:</b> UV-vis absorption and emission spectra of <b>ZnPorT8/Hg<sup>2+</sup></b> complex (4.0 $\mu\text{M}$ $\text{Hg}^{2+}$ ) titrated with <i>Cys</i>                                            | .....S4     |
| <b>Figure S5:</b> UV-vis absorption and emission spectra of <b>ZnPorT8/Hg<sup>2+</sup></b> complex (5.0 $\mu\text{M}$ $\text{Hg}^{2+}$ ) titrated with <i>L-Cys</i>                                          | .....S5     |
| <b>Figure S6:</b> UV-vis absorption and emission spectra of <b>ZnPorT8/Hg<sup>2+</sup></b> complex (5.0 $\mu\text{M}$ $\text{Hg}^{2+}$ ) titrated with <i>D-Cys</i>                                          | .....S5     |
| <b>Figure S7:</b> UV-vis absorption and emission spectra of <b>ZnPorT8/Hg<sup>2+</sup></b> complex (5.0 $\mu\text{M}$ $\text{Hg}^{2+}$ ) titrated with <i>GSH</i>                                            | .....S6     |
| <b>Figure S8:</b> UV-vis absorption and emission spectra of <b>ZnPorT8/Hg<sup>2+</sup></b> complex (5.0 $\mu\text{M}$ $\text{Hg}^{2+}$ ) titrated with <i>Ala</i>                                            | .....S6     |
| <b>Figure S9:</b> UV-vis absorption and emission spectra of <b>ZnPorT8/Hg<sup>2+</sup></b> complex (5.0 $\mu\text{M}$ $\text{Hg}^{2+}$ ) titrated with <i>Arg</i>                                            | ..... S7    |
| <b>Figure S10:</b> UV-vis absorption and emission spectra of <b>ZnPorT8/Hg<sup>2+</sup></b> complex (5.0 $\mu\text{M}$ $\text{Hg}^{2+}$ ) titrated with <i>Asn</i>                                           | ..... S7    |
| <b>Figure S11:</b> UV-vis absorption and emission spectra of <b>ZnPorT8/Hg<sup>2+</sup></b> complex (5.0 $\mu\text{M}$ $\text{Hg}^{2+}$ ) titrated with <i>Gln</i>                                           | ..... S8    |
| <b>Figure S12:</b> UV-vis absorption and emission spectra of <b>ZnPorT8/Hg<sup>2+</sup></b> complex (5.0 $\mu\text{M}$ $\text{Hg}^{2+}$ ) titrated with <i>Glu</i>                                           | ..... S8    |
| <b>Figure S13:</b> UV-vis absorption and emission spectra of <b>ZnPorT8/Hg<sup>2+</sup></b> complex (5.0 $\mu\text{M}$ $\text{Hg}^{2+}$ ) titrated with <i>Gly</i>                                           | ..... S9    |
| <b>Figure S14:</b> UV-vis absorption and emission spectra of <b>ZnPorT8/Hg<sup>2+</sup></b> complex (5.0 $\mu\text{M}$ $\text{Hg}^{2+}$ ) titrated with <i>His</i>                                           | ..... S9    |
| <b>Figure S15:</b> UV-vis absorption and emission spectra of <b>ZnPorT8/Hg<sup>2+</sup></b> complex (5.0 $\mu\text{M}$ $\text{Hg}^{2+}$ ) titrated with <i>Ile</i>                                           | ..... S10   |
| <b>Figure S16:</b> UV-vis absorption and emission spectra of <b>ZnPorT8/Hg<sup>2+</sup></b> complex (5.0 $\mu\text{M}$ $\text{Hg}^{2+}$ ) titrated with <i>Leu</i>                                           | .....S10    |
| <b>Figure S17:</b> UV-vis absorption and emission spectra of <b>ZnPorT8/Hg<sup>2+</sup></b> complex (5.0 $\mu\text{M}$ $\text{Hg}^{2+}$ ) titrated with <i>Lys</i>                                           | .....S11    |
| <b>Figure S18:</b> UV-vis absorption and emission spectra of <b>ZnPorT8/Hg<sup>2+</sup></b> complex (5.0 $\mu\text{M}$ $\text{Hg}^{2+}$ ) titrated with <i>Met</i>                                           | .....S11    |
| <b>Figure S19:</b> UV-vis absorption and emission spectra of <b>ZnPorT8/Hg<sup>2+</sup></b> complex (5.0 $\mu\text{M}$ $\text{Hg}^{2+}$ ) titrated with <i>Pro</i>                                           | .....S12    |
| <b>Figure S20:</b> UV-vis absorption and emission spectra of <b>ZnPorT8/Hg<sup>2+</sup></b> complex (5.0 $\mu\text{M}$ $\text{Hg}^{2+}$ ) titrated with <i>Phe</i>                                           | .....S12    |
| <b>Figure S21:</b> UV-vis absorption and emission spectra of <b>ZnPorT8/Hg<sup>2+</sup></b> complex (5.0 $\mu\text{M}$ $\text{Hg}^{2+}$ ) titrated with <i>Ser</i>                                           | .....S13    |
| <b>Figure S22:</b> UV-vis absorption and emission spectra of <b>ZnPorT8/Hg<sup>2+</sup></b> complex (5.0 $\mu\text{M}$ $\text{Hg}^{2+}$ ) titrated with <i>Thr</i>                                           | .....S13    |
| <b>Figure S23:</b> UV-vis absorption and emission spectra of <b>ZnPorT8/Hg<sup>2+</sup></b> complex (5.0 $\mu\text{M}$ $\text{Hg}^{2+}$ ) titrated with <i>Tyr</i>                                           | .....S14    |
| <b>Figure S24:</b> UV-vis absorption and emission spectra of <b>ZnPorT8/Hg<sup>2+</sup></b> complex (5.0 $\mu\text{M}$ $\text{Hg}^{2+}$ ) titrated with <i>Trp</i>                                           | .....S14    |
| <b>Figure S25:</b> UV-vis absorption and emission spectra of <b>ZnPorT8/Hg<sup>2+</sup></b> complex (5.0 $\mu\text{M}$ $\text{Hg}^{2+}$ ) titrated with <i>Val</i>                                           | .....S15    |
| <b>Figure S26:</b> UV-vis absorption and emission spectra of <b>ZnPorT8/Cu<sup>2+</sup></b> complex (20.0 $\mu\text{M}$ $\text{Cu}^{2+}$ ) titrated with <i>Cys</i>                                          | .....S15    |
| <b>Figure S27:</b> UV-vis absorption and emission spectra of <b>ZnPorT8/Cu<sup>2+</sup></b> complex (20.0 $\mu\text{M}$ $\text{Cu}^{2+}$ ) titrated with <i>GSH</i>                                          | .....S16    |
| <b>Figure S28:</b> UV-vis absorption changes of <b>ZnPorT8/Cu<sup>2+</sup></b> complex (20.0 $\mu\text{M}$ $\text{Cu}^{2+}$ ) vs. conc. of <i>GSH</i>                                                        | .....S17    |
| <b>Figure S29:</b> UV-vis absorption changes of <b>ZnPorT8/Hg<sup>2+</sup></b> complex (5.0 $\mu\text{M}$ $\text{Hg}^{2+}$ ) vs. conc. of <i>GSH</i>                                                         | .....S17    |
| <b>Figure S30:</b> Changes of fluorescence intensity of the <b>ZnPorT8/Hg<sup>2+</sup></b> systems at 654.0 nm as a function of the <i>L-Cys</i> concentration for different $\text{Hg}^{2+}$ concentrations | .....S17    |
| <b>Figure S31</b> Competitive sensing: UV-vis absorption and emission spectra of <b>ZnPorT8/Hg<sup>2+</sup></b> complex (5.0 $\mu\text{M}$ $\text{Hg}^{2+}$ ) titrated with a mixture of amino acids         | .....S18    |
| <b>Table S1.</b> Relative fluorescence quantum yields.                                                                                                                                                       | .....S18    |

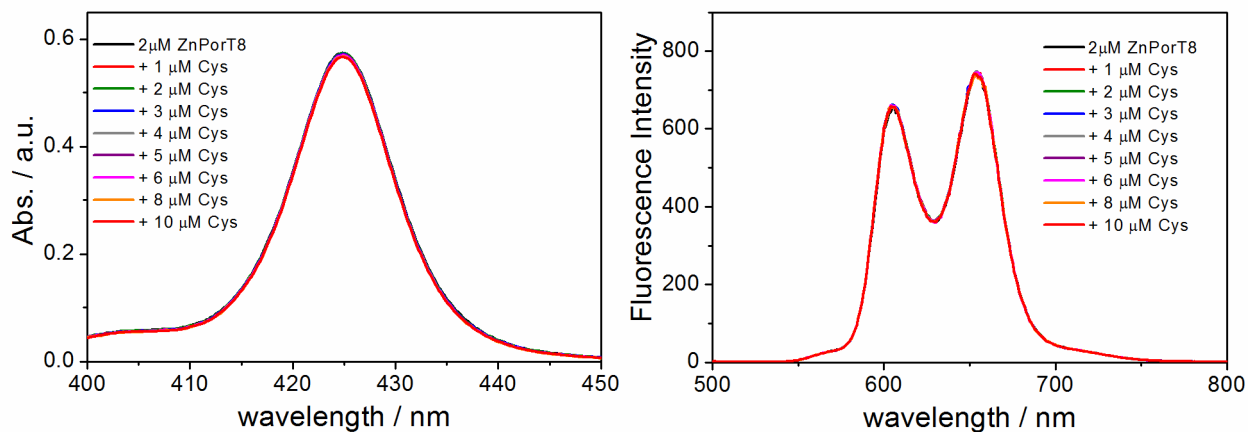

**Figure S1.** UV-vis absorption (left) and emission (right) spectra of the **ZnPorT8** (2 $\mu$ M) upon stepwise addition of the cysteine (Cys) from 1 to 10  $\mu$ M in Na-cacodylate buffer (1 mM, pH = 7.0, 20  $^{\circ}$ C).

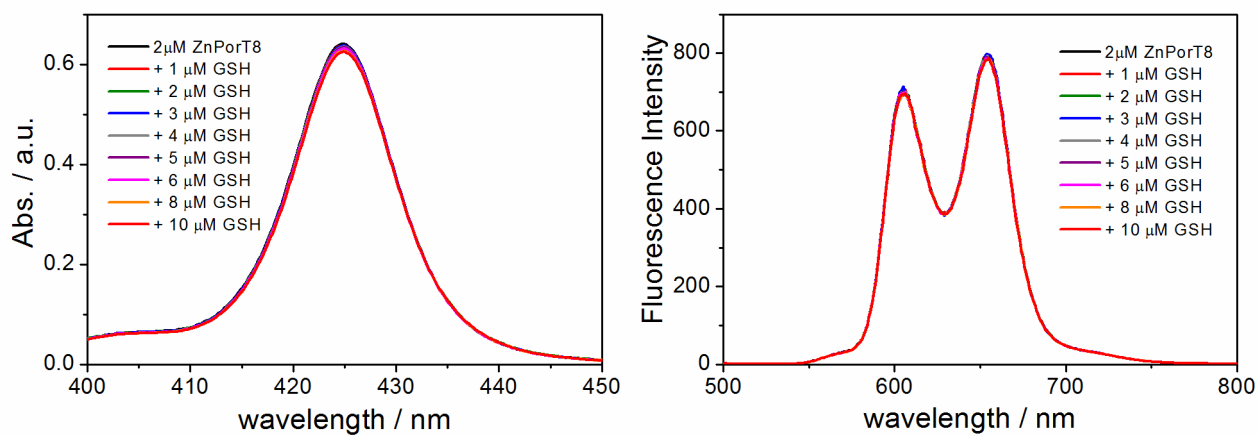

**Figure S2.** UV-vis absorption (left) and emission (right) spectra of the **ZnPorT8** (2 $\mu$ M) upon stepwise addition of the glutathione (GSH) from 1 to 10  $\mu$ M in Na-cacodylate buffer (1 mM, pH = 7.0, 20  $^{\circ}$ C).

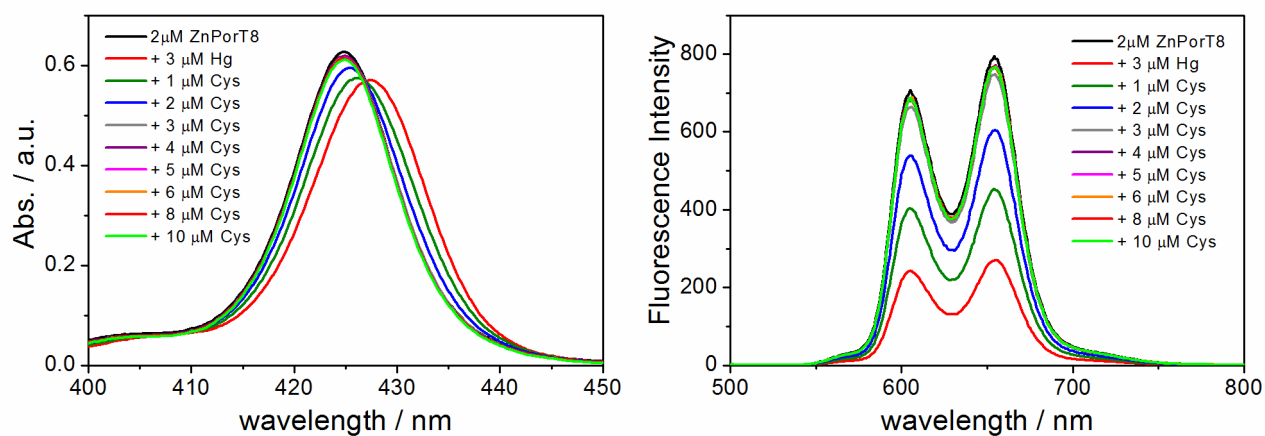

**Figure S3.** UV-vis absorption (left) and emission (right) spectra of the **ZnPorT8/Hg<sup>2+</sup>** complex (2.0 μM of **ZnPorT8** and 3.0 μM of **Hg<sup>2+</sup>** ion) upon stepwise addition of the cysteine (Cys) from 1 to 10 μM in Na-cacodylate buffer (1 mM, pH = 7.0, 20 °C).

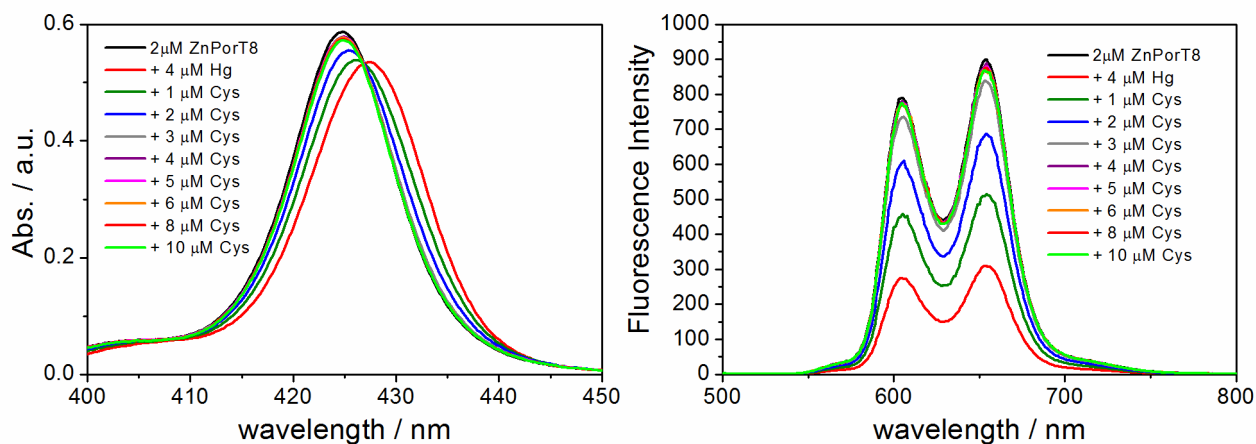

**Figure S4.** UV-vis absorption (left) and emission (right) spectra of the **ZnPorT8/Hg<sup>2+</sup>** complex (2.0 μM of **ZnPorT8** and 4.0 μM of **Hg<sup>2+</sup>** ion) upon stepwise addition of the cysteine (Cys) from 1 to 10 μM in Na-cacodylate buffer (1 mM, pH = 7.0, 20 °C).

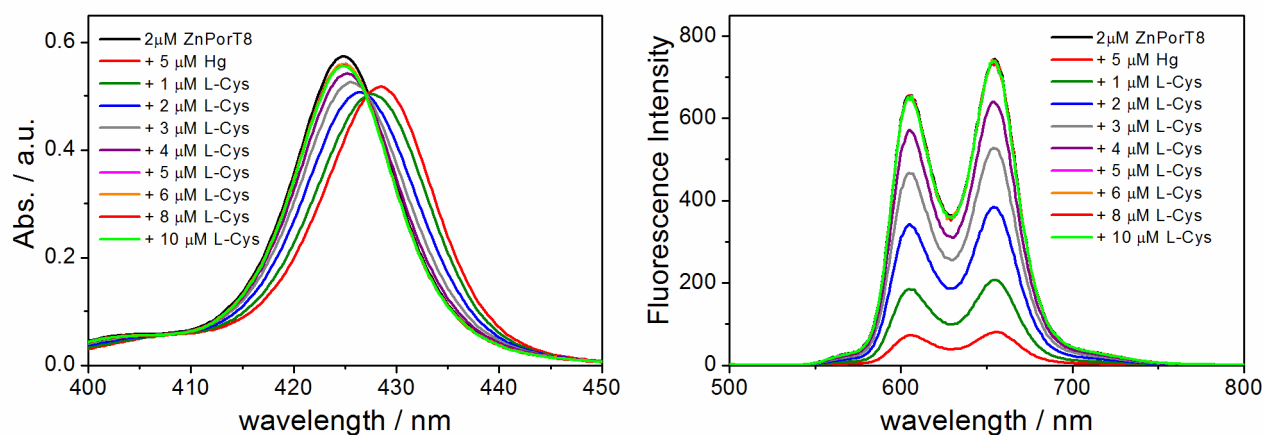

**Figure S5.** UV-vis absorption (left) and emission (right) spectra of the **ZnPorT8/Hg<sup>2+</sup>** complex (2.0 μM of **ZnPorT8** and 5.0 μM of **Hg<sup>2+</sup>** ion) upon stepwise addition of the L-cysteine (L-Cys) from 1 to 10 μM in Na-cacodylate buffer (1 mM, pH = 7.0, 20 °C).

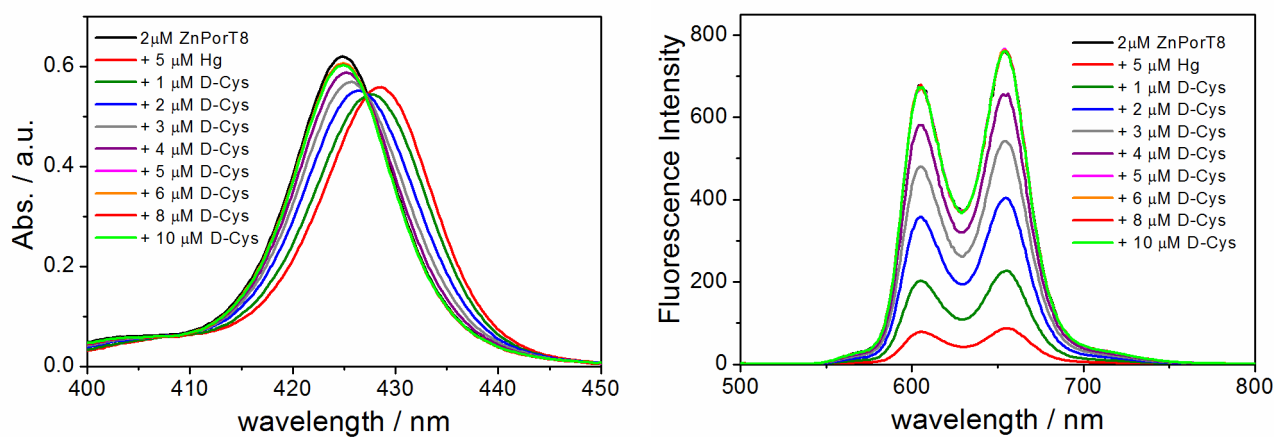

**Figure S6.** UV-vis absorption (left) and emission (right) spectra of the **ZnPorT8/Hg<sup>2+</sup>** complex (2.0 μM of **ZnPorT8** and 5.0 μM of **Hg<sup>2+</sup>** ion) upon stepwise addition of the D-cysteine (D-Cys) from 1 to 10 μM in Na-cacodylate buffer (1 mM, pH = 7.0, 20 °C).

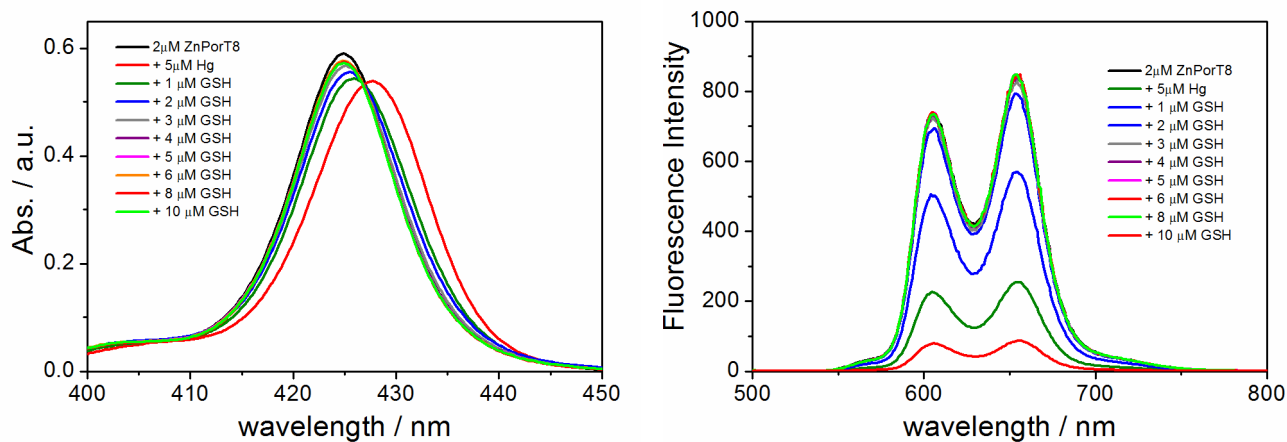

**Figure S7.** UV-vis absorption (left) and emission (right) spectra of the **ZnPorT8/Hg<sup>2+</sup>** complex (2.0 μM of **ZnPorT8** and 5.0 μM of Hg<sup>2+</sup> ion) upon stepwise addition of the Glutathione (GSH) from 1 to 10 μM in Na-cacodylate buffer (1 mM, pH = 7.0, 20 °C).

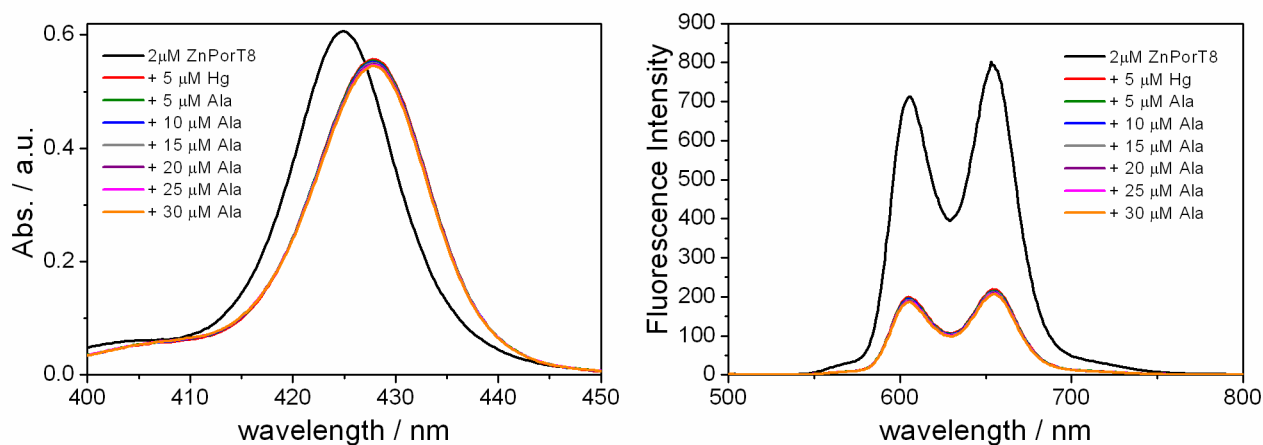

**Figure S8.** UV-vis absorption (left) and emission (right) spectra of the **ZnPorT8/Hg<sup>2+</sup>** complex (2.0 μM of **ZnPorT8** and 5.0 μM of Hg<sup>2+</sup> ion) upon stepwise addition of the alanine (Ala) from 5 to 30 μM in Na-cacodylate buffer (1 mM, pH = 7.0, 20 °C).

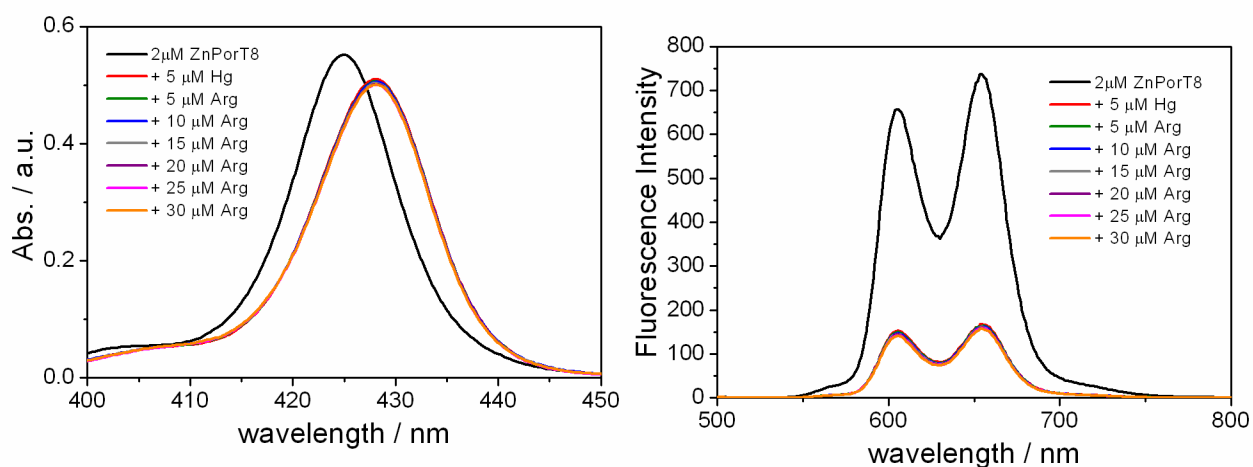

**Figure S9.** UV-vis absorption (left) and emission (right) spectra of the **ZnPorT8/Hg<sup>2+</sup>** complex (2.0 μM of **ZnPorT8** and 5.0 μM of Hg<sup>2+</sup> ion) upon stepwise addition of the arginine (Arg) from 5 to 30 μM in Na-cacodylate buffer (1 mM, pH = 7.0, 20 °C).

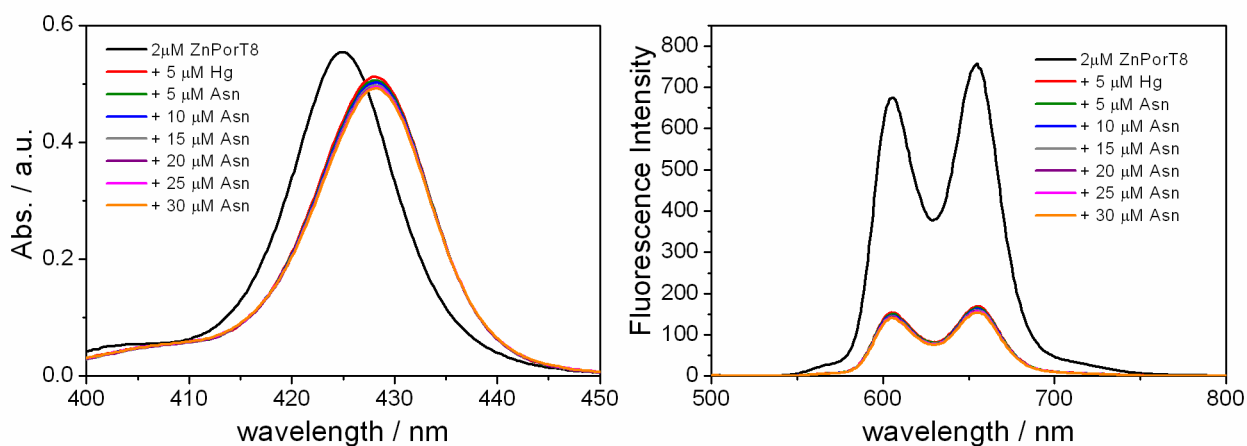

**Figure S10.** UV-vis absorption (left) and emission (right) spectra of the **ZnPorT8/Hg<sup>2+</sup>** complex (2.0 μM of **ZnPorT8** and 5.0 μM of Hg<sup>2+</sup> ion) upon stepwise addition of the aspartic acid (Asn) from 5 to 30 μM in Na-cacodylate buffer (1 mM, pH = 7.0, 20 °C).

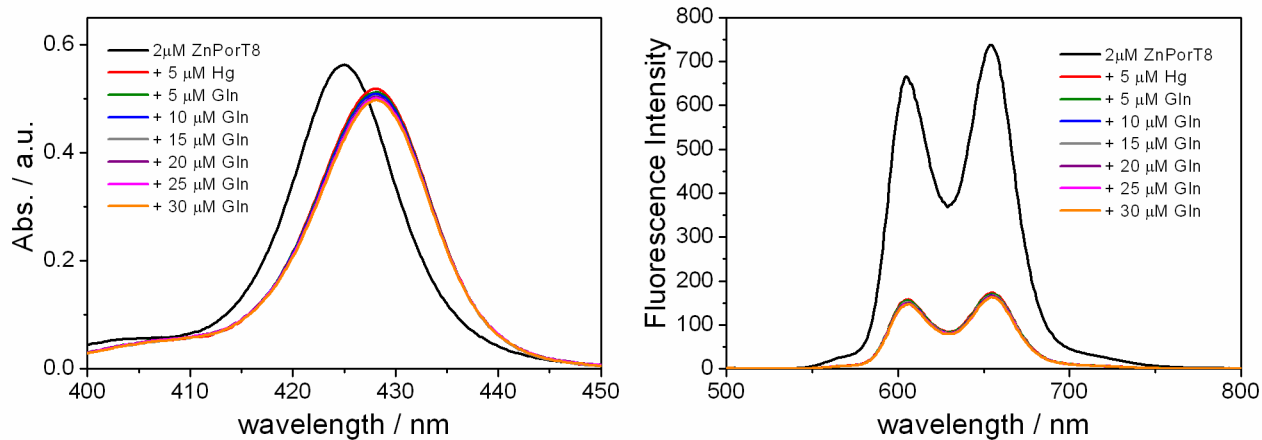

**Figure S11.** UV-vis absorption (left) and emission (right) spectra of the **ZnPorT8/Hg<sup>2+</sup>** complex (2.0 μM of **ZnPorT8** and 5.0 μM of Hg<sup>2+</sup> ion) upon stepwise addition of the glutamic acid (Gln) from 5 to 30 μM in Na-cacodylate buffer (1 mM, pH = 7.0, 20 °C).

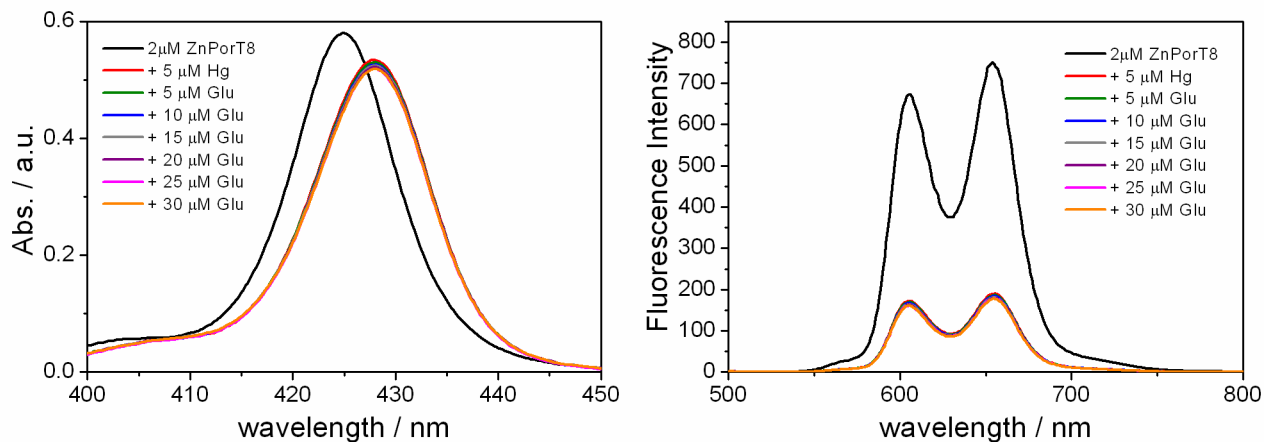

**Figure S12.** UV-vis absorption (left) and emission (right) spectra of the **ZnPorT8/Hg<sup>2+</sup>** complex (2.0 μM of **ZnPorT8** and 5.0 μM of Hg<sup>2+</sup> ion) upon stepwise addition of the glutamine (Glu) from 5 to 30 μM in Na-cacodylate buffer (1 mM, pH = 7.0, 20 °C).



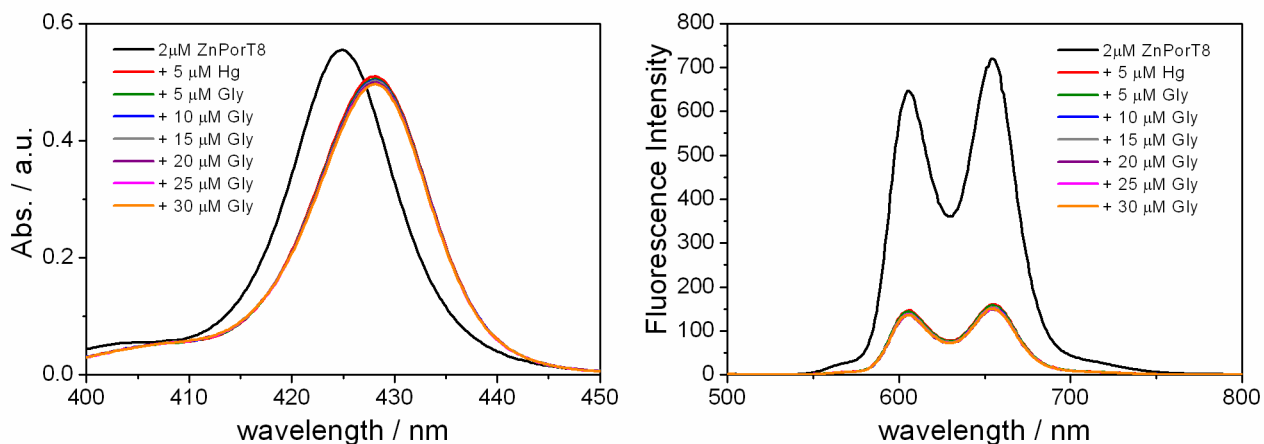

**Figure S13.** UV-vis absorption (left) and emission (right) spectra of the **ZnPorT8/Hg<sup>2+</sup>** complex (2.0 μM of **ZnPorT8** and 5.0 μM of Hg<sup>2+</sup> ion) upon stepwise addition of the glycine (Gly) from 5 to 30 μM in Na-cacodylate buffer (1 mM, pH = 7.0, 20 °C).

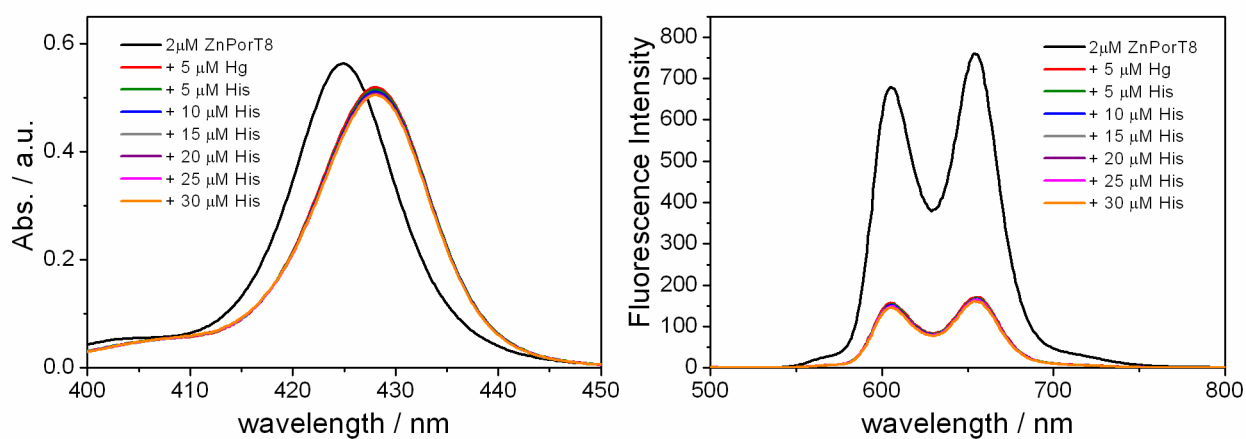

**Figure S14.** UV-vis absorption (left) and emission (right) spectra of the **ZnPorT8/Hg<sup>2+</sup>** complex (2.0 μM of **ZnPorT8** and 5.0 μM of Hg<sup>2+</sup> ion) upon stepwise addition of the Histidine (His) from 5 to 30 μM in Na-cacodylate buffer (1 mM, pH = 7.0, 20 °C).

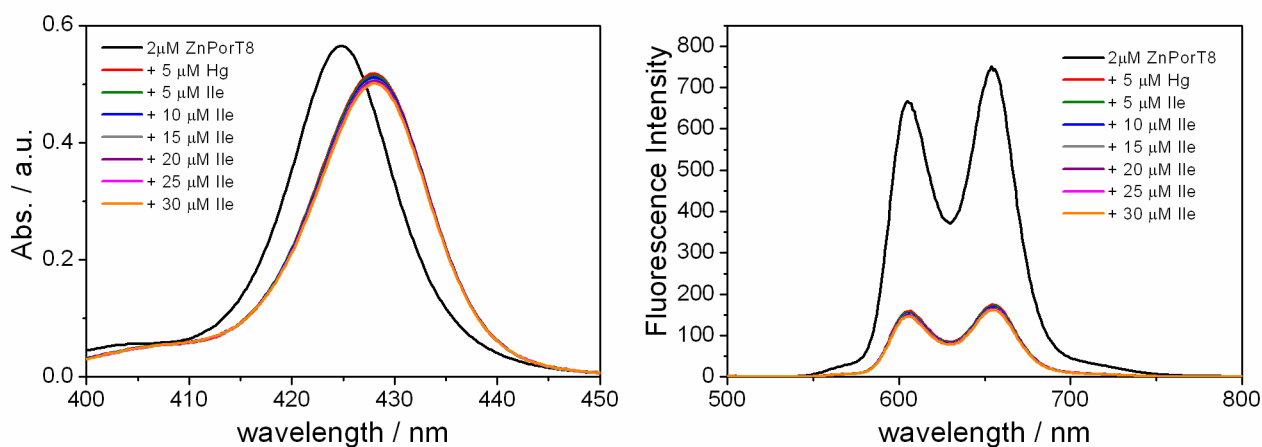

**Figure S15.** UV-vis absorption (left) and emission (right) spectra of the **ZnPorT8/Hg<sup>2+</sup>** complex (2.0 μM of **ZnPorT8** and 5.0 μM of Hg<sup>2+</sup> ion) upon stepwise addition of the iso-leucine (Ile) from 5 to 30 μM in Na-cacodylate buffer (1 mM, pH = 7.0, 20 °C).

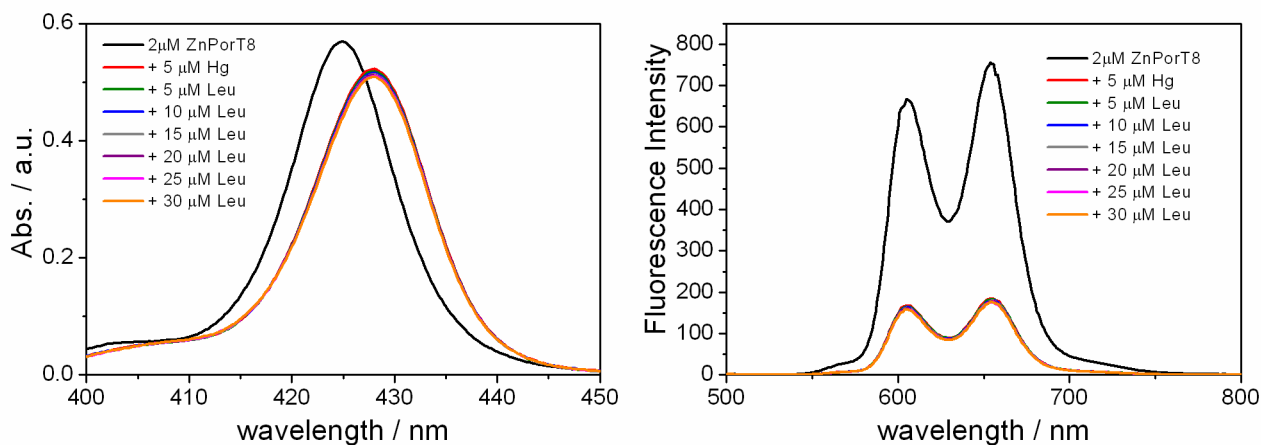

**Figure S16.** UV-vis absorption (left) and emission (right) spectra of the **ZnPorT8/Hg<sup>2+</sup>** complex (2.0 μM of **ZnPorT8** and 5.0 μM of Hg<sup>2+</sup> ion) upon stepwise addition of the leucine (Leu) from 5 to 30 μM in Na-cacodylate buffer (1 mM, pH = 7.0, 20 °C).

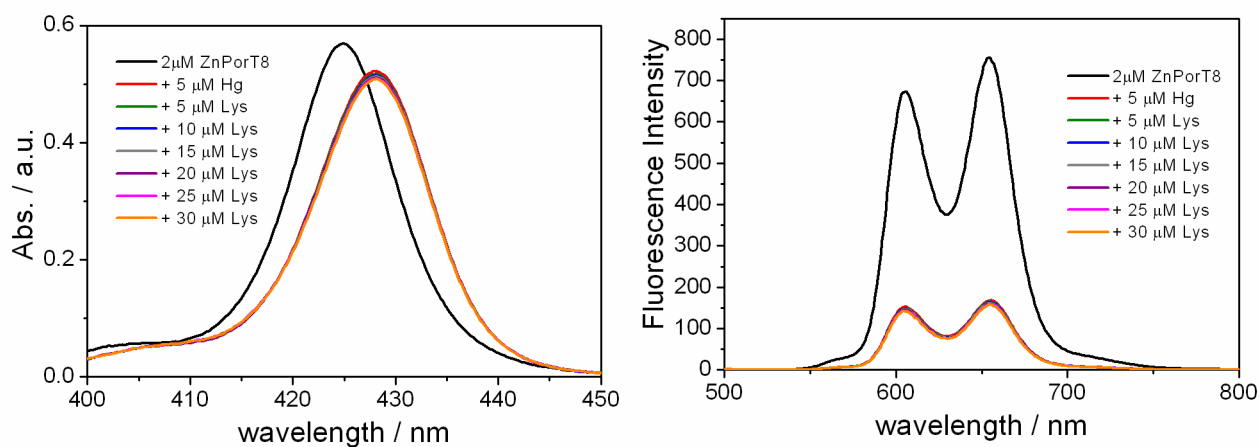

**Figure S17.** UV-vis absorption (left) and emission (right) spectra of the **ZnPorT8/Hg<sup>2+</sup>** complex (2.0 μM of **ZnPorT8** and 5.0 μM of **Hg<sup>2+</sup>** ion) upon stepwise addition of the lysine (Lys) from 5 to 30 μM in Na-cacodylate buffer (1 mM, pH = 7.0, 20 °C).

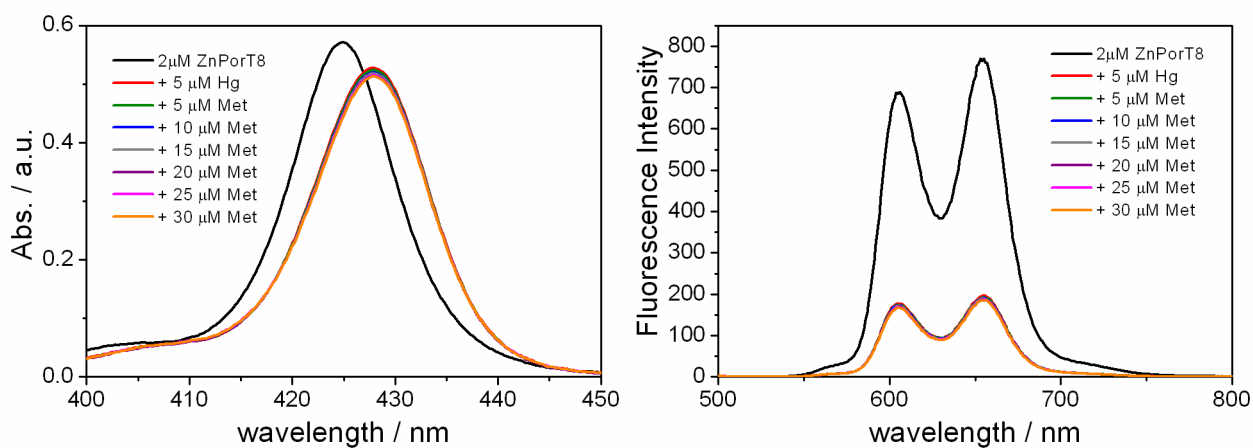

**Figure S18.** UV-vis absorption (left) and emission (right) spectra of the **ZnPorT8/Hg<sup>2+</sup>** complex (2.0 μM of **ZnPorT8** and 5.0 μM of **Hg<sup>2+</sup>** ion) upon stepwise addition of the methionine (Met) from 5 to 30 μM in Na-cacodylate buffer (1 mM, pH = 7.0, 20 °C).

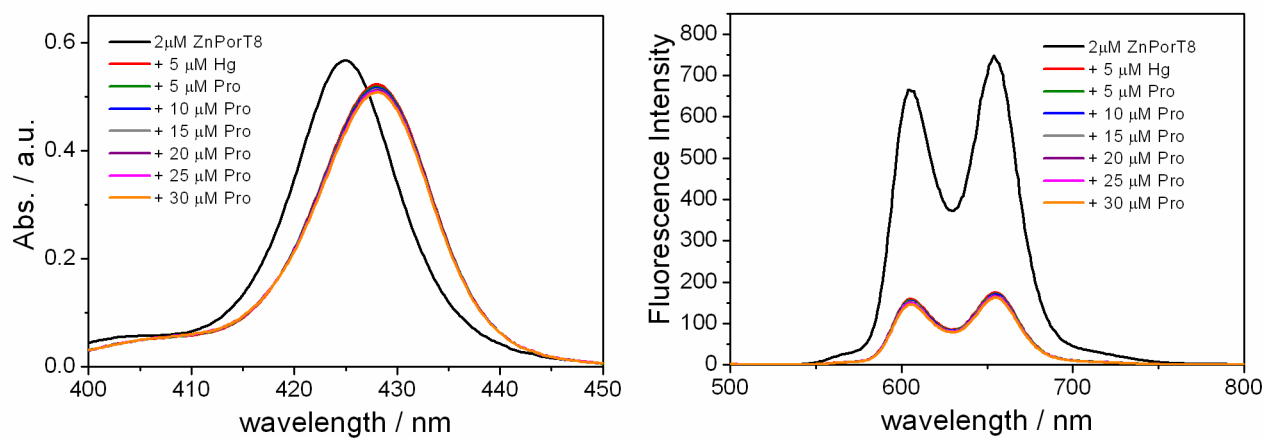

**Figure S19.** UV-vis absorption (left) and emission (right) spectra of the **ZnPorT8/Hg<sup>2+</sup>** complex (2.0 μM of **ZnPorT8** and 5.0 μM of **Hg<sup>2+</sup>** ion) upon stepwise addition of the proline (Pro) from 5 to 30 μM in Na-cacodylate buffer (1 mM, pH = 7.0, 20 °C).

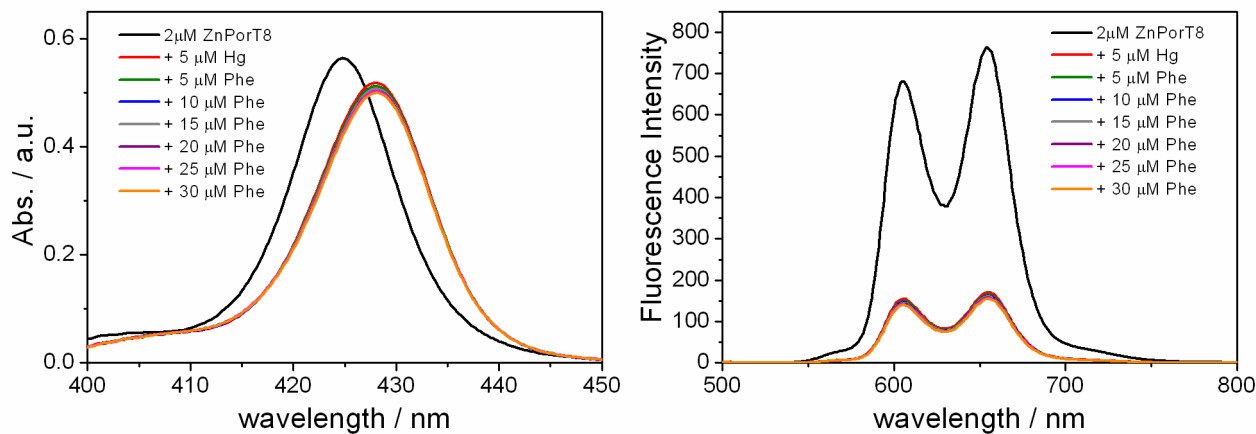

**Figure S20.** UV-vis absorption (left) and emission (right) spectra of the **ZnPorT8/Hg<sup>2+</sup>** complex (2.0 μM of **ZnPorT8** and 5.0 μM of **Hg<sup>2+</sup>** ion) upon stepwise addition of the phenylalanine (Phe) from 5 to 30 μM in Na-cacodylate buffer (1 mM, pH = 7.0, 20 °C).

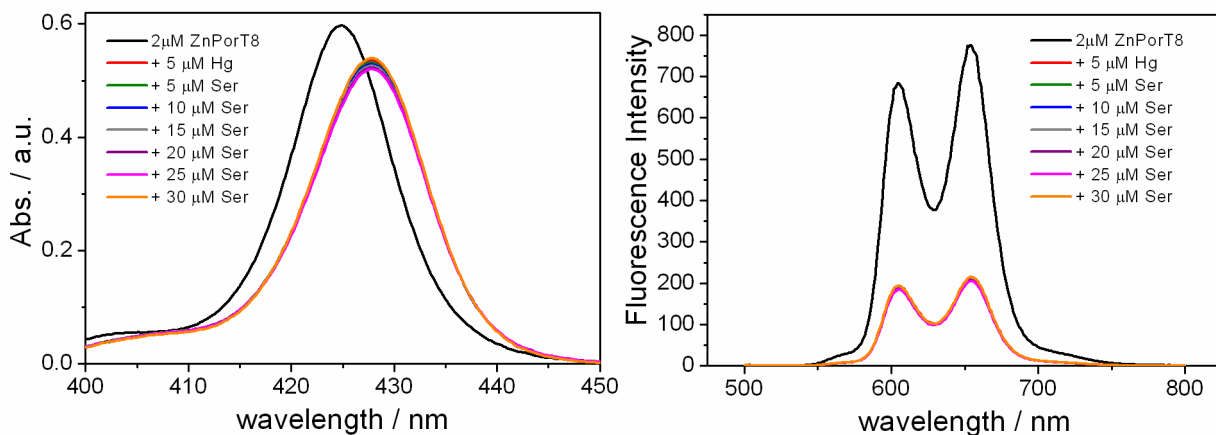

**Figure S21.** UV-vis absorption (left) and emission (right) spectra of the **ZnPorT8/Hg<sup>2+</sup>** complex (2.0 μM of **ZnPorT8** and 5.0 μM of Hg<sup>2+</sup> ion) upon stepwise addition of the serine (Ser) from 5 to 30 μM in Na-cacodylate buffer (1 mM, pH = 7.0, 20 °C).

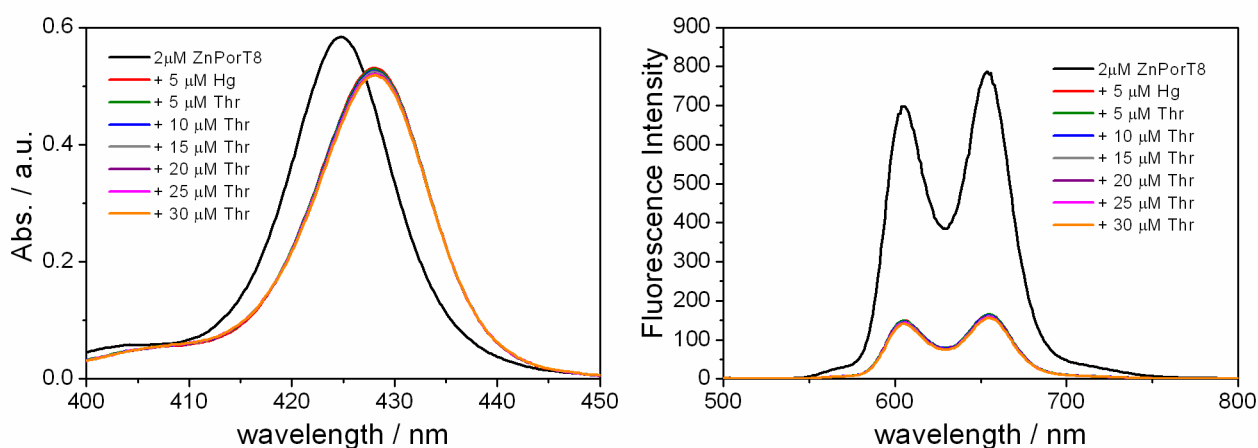

**Figure S22.** UV-vis absorption (left) and emission (right) spectra of the **ZnPorT8/Hg<sup>2+</sup>** complex (2.0 μM of **ZnPorT8** and 5.0 μM of Hg<sup>2+</sup> ion) upon stepwise addition of the threonine (Thr) from 5 to 30 μM in Na-cacodylate buffer (1 mM, pH = 7.0, 20 °C).

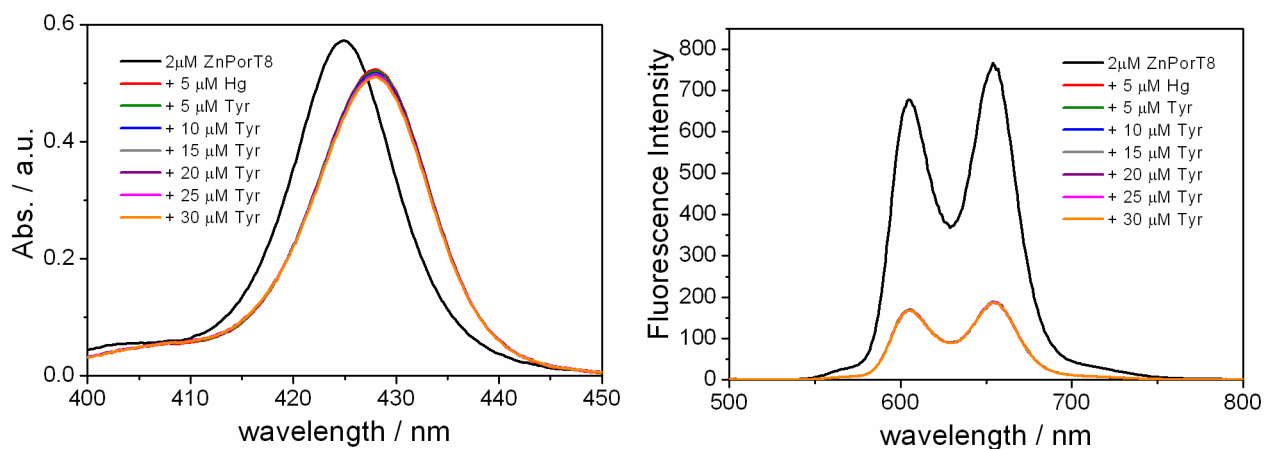

**Figure S23.** UV-vis absorption (left) and emission (right) spectra of the **ZnPorT8/Hg<sup>2+</sup>** complex (2.0 μM of **ZnPorT8** and 5.0 μM of **Hg<sup>2+</sup>** ion) upon stepwise addition of the tyrosine (Tyr) from 5 to 30 μM in Na-cacodylate buffer (1 mM, pH = 7.0, 20 °C).

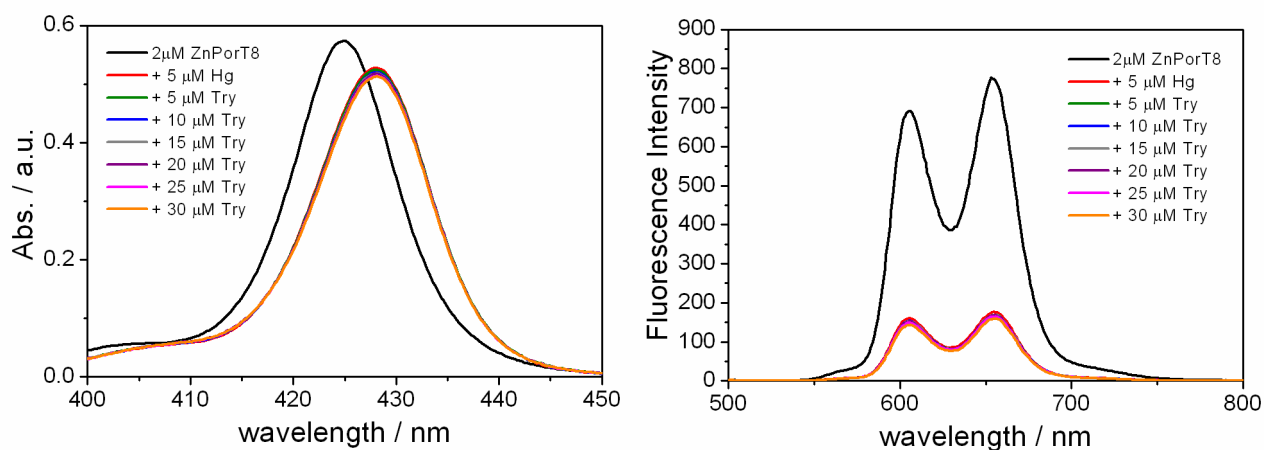

**Figure S24.** UV-vis absorption (left) and emission (right) spectra of the **ZnPorT8/Hg<sup>2+</sup>** complex (2.0 μM of **ZnPorT8** and 5.0 μM of **Hg<sup>2+</sup>** ion) upon stepwise addition of the tryptophan (Trp) from 5 to 30 μM in Na-cacodylate buffer (1 mM, pH = 7.0, 20 °C).

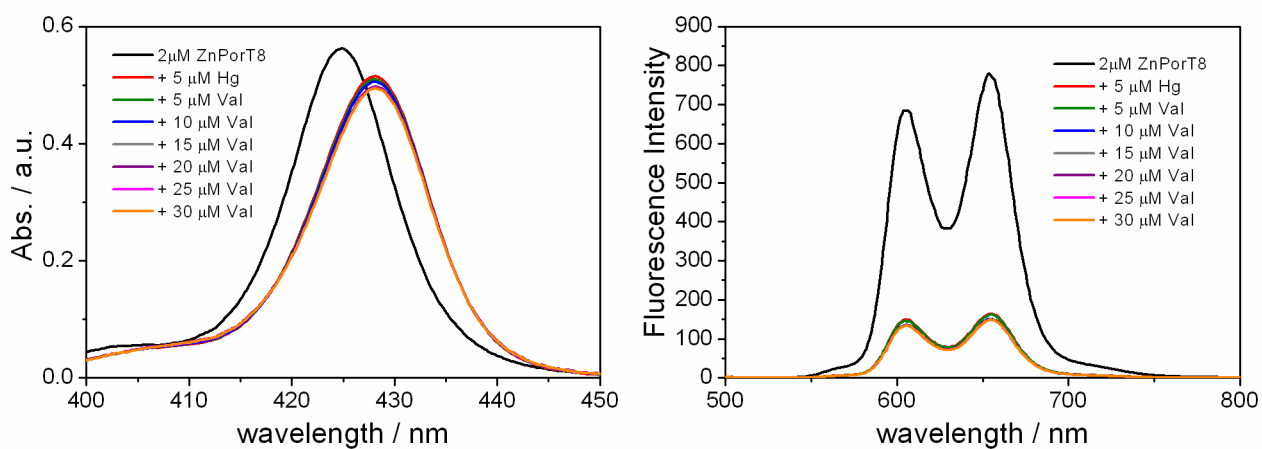

**Figure S25.** UV-vis absorption (left) and emission (right) spectra of the **ZnPorT8/Hg<sup>2+</sup>** complex (2.0 μM of **ZnPorT8** and 5.0 μM of Hg<sup>2+</sup> ion) upon stepwise addition of the valine (Val) from 5 to 30 μM in Na-cacodylate buffer (1 mM, pH = 7.0, 20 °C).

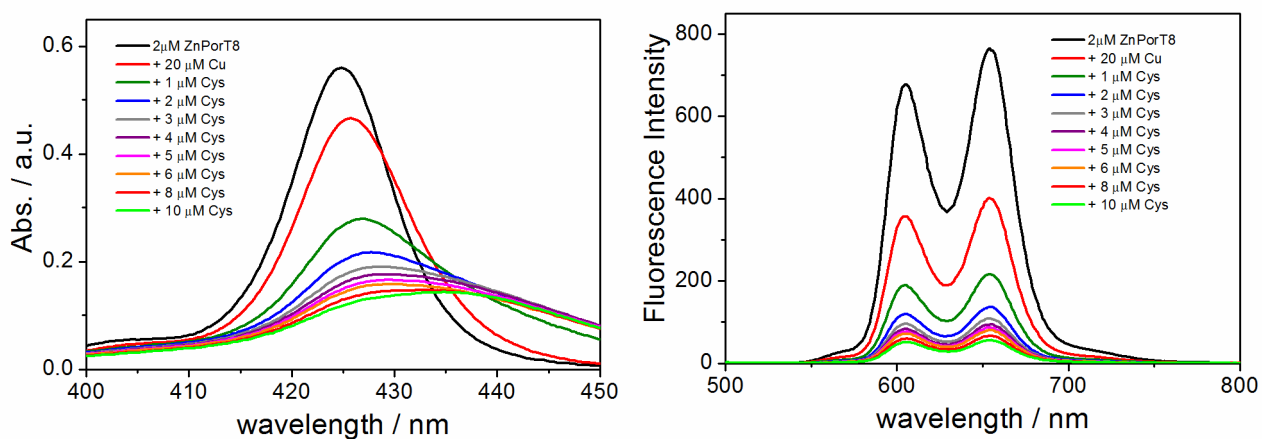

**Figure S26.** UV-vis absorption (left) and emission (right) spectra of the **ZnPorT8/Cu<sup>2+</sup>** complex (2.0 μM of **ZnPorT8** and 20.0 μM of Cu<sup>2+</sup> ion) upon stepwise addition of the cysteine (Cys) from 1 to 10 μM in Na-cacodylate buffer (1 mM, pH = 7.0, 20 °C).

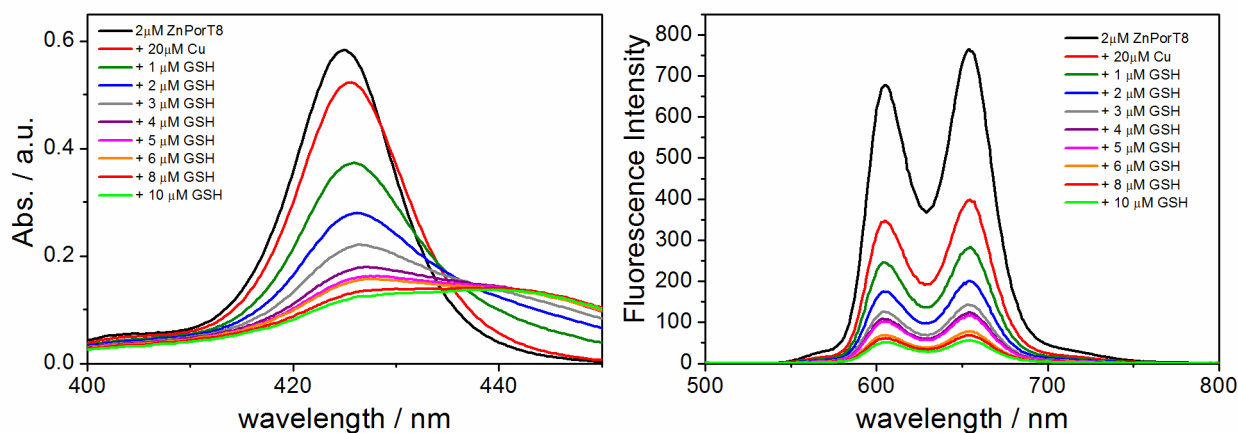

**Figure S27.** UV-vis absorption (left) and emission (right) spectra of the **ZnPorT8/Cu<sup>2+</sup>** complex (2.0 μM of **ZnPorT8** and 20.0 μM of **Cu<sup>2+</sup>** ion) upon stepwise addition of the Glutathione (GSH) from 1 to 10 μM in Na-cacodylate buffer (1 mM, pH = 7.0, 20 °C).

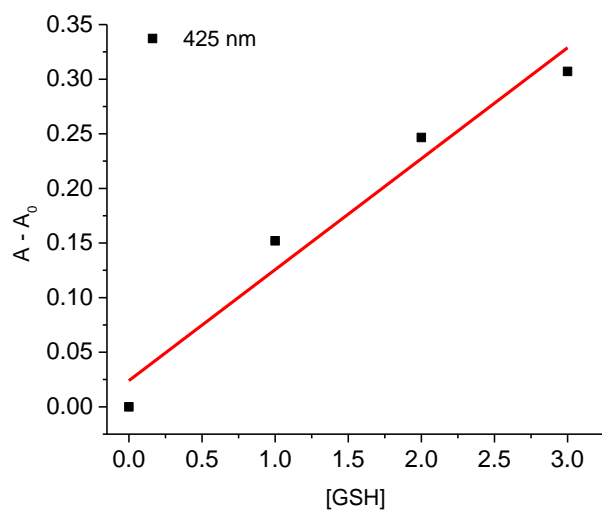

**Figure S28.** UV-vis absorption changes of the **ZnPorT8/Cu<sup>2+</sup>** complex at 425.0 nm as a function of the GSH concentration ( $A - A_0$ ,  $A_0$ : absorbance of **ZnPorT8/Cu<sup>2+</sup>**,  $A$ : absorbance of **ZnPorT8/Cu<sup>2+</sup>** after addition of GSH).



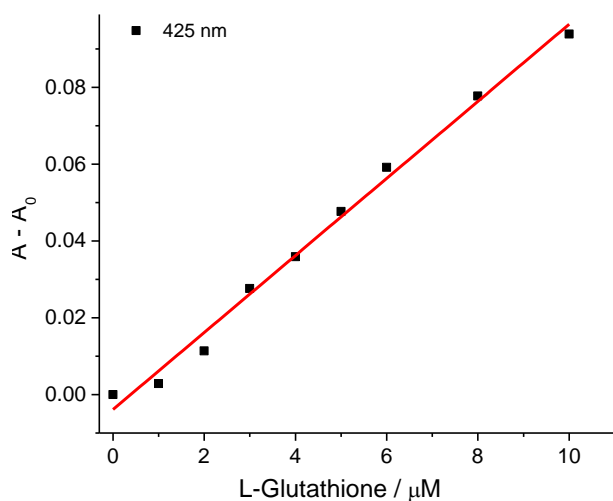

**Figure S29.** UV-vis absorption changes of the **ZnPorT8/Hg<sup>2+</sup>** complex at 425.0 nm as a function of the GSH concentration ( $A - A_0$ ,  $A_0$ : absorbance of **ZnPorT8/Hg<sup>2+</sup>**,  $A$ : absorbance of **ZnPorT8/Hg<sup>2+</sup>** after addition of GSH).

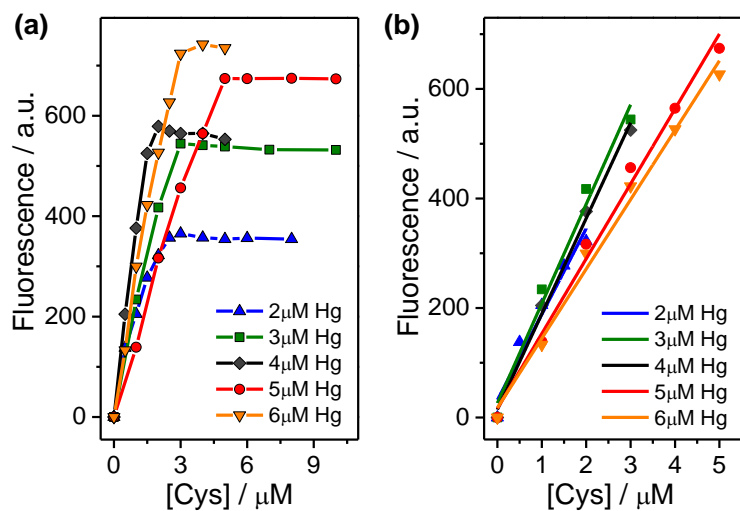

**Figure S30.** (a) Changes of fluorescence intensity of the **ZnPorT8/Hg<sup>2+</sup>** systems ( $[\text{ZnPorT8}] = 2.0 \mu\text{M}$ ,  $[\text{Hg}^{2+}] = 2.0 \mu\text{M}$ : blue line,  $3.0 \mu\text{M}$ : green line,  $4.0 \mu\text{M}$ : black line,  $5.0 \mu\text{M}$ : red line, and  $6.0 \mu\text{M}$ : orange line) at 654.0 nm as a function of the L-Cys concentration (0 to 10.0  $\mu\text{M}$  in 1.0  $\mu\text{M}$  addition steps). (b) Fluorescence intensity changes of the **ZnPorT8/Hg<sup>2+</sup>** systems as a function of the L-Cys concentration (0 to 5.0  $\mu\text{M}$ ) detected at 654.0 nm and their linear fits (colored lines,  $F - F_0$ ,  $F_0$ : fluorescence intensity of **ZnPorT8/Hg<sup>2+</sup>**,  $F$ : fluorescence intensity **ZnPorT8/Hg<sup>2+</sup>** after addition of L-Cys).

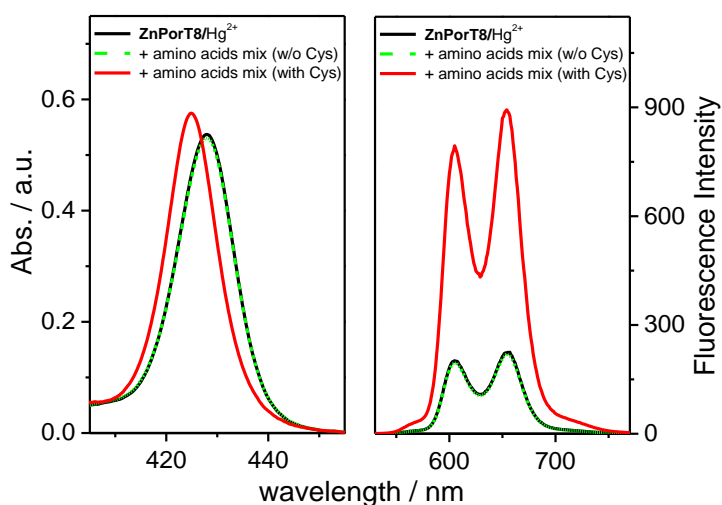

**Figure S31.** a) UV/Vis absorption and b) emission ( $\lambda_{\text{exc}} = 425 \text{ nm}$ ) spectra of the **ZnPorT8/Hg<sup>2+</sup>** complex (black curve, **[ZnPorT8]** = 2.0  $\mu\text{M}$ , **[Hg<sup>2+</sup>]** = 5.0  $\mu\text{M}$ ) in the presence of an amino acid mixture (Ala, Lys, Met, Pro and Trp; each 5.0  $\mu\text{M}$ ) with 5.0  $\mu\text{M}$  L-Cys (red curve) and without L-Cys (green dashed curve).

**Table S1.** Relative fluorescence quantum yields of **ZnPorT8**, **ZnPorT8/Hg(II)**, and **ZnPorT8/Cu(II)**.

| system                | [ZnPorT8]       | [M(II)]          | $\Phi F_{\text{rel}}$ |
|-----------------------|-----------------|------------------|-----------------------|
| <b>ZnPorT8</b>        | 2 $\mu\text{M}$ | --               | 1.0                   |
| <b>ZnPorT8/Hg(II)</b> | 2 $\mu\text{M}$ | 5 $\mu\text{M}$  | 0.06                  |
| <b>ZnPorT8/Cu(II)</b> | 2 $\mu\text{M}$ | 5 $\mu\text{M}$  | 0.87                  |
| <b>ZnPorT8/Cu(II)</b> | 2 $\mu\text{M}$ | 20 $\mu\text{M}$ | 0.59                  |
